# Supplementary material for: A20 as a Potential New Tool in Predicting Recurrence and Patient’s Survival in Oral Squamous Cell Carcinoma
Source: MDPI journal article supplement (doi:10.3390/cancers15030675), 2023-01-21
Supplement: s1 [file s1]

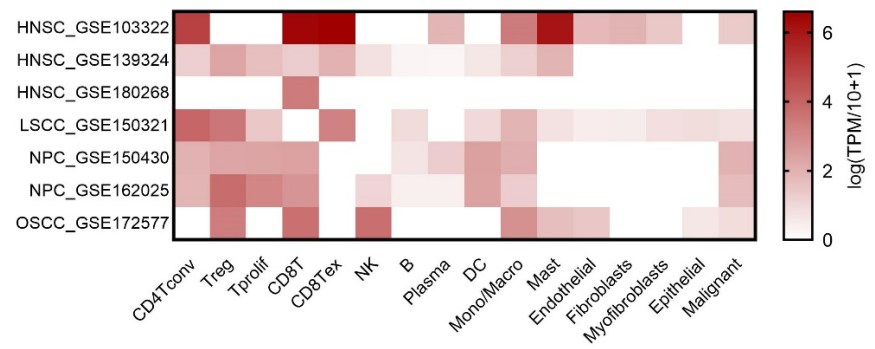

**Supplementary Figure S1.** Average TNFAIP3 gene expression levels in individual cell types of 7 independent HNSCC patient cohorts which were analyzed by single cell RNA-sequencing.
